# Supplementary material for: P2X-mediated AMPA receptor internalization and synaptic depression is controlled by two CaMKII phosphorylation sites on GluA1 in hippocampal neurons
Source: PubMed Central journal article supplement (PMC5022001; doi:10.1038/srep31836), 2016-09-14
Supplement: srep31836-s1.pdf [file srep31836-s1.pdf]

## Supplementary Information

### **P2X-mediated AMPA receptor internalization and synaptic depression is controlled by two CaMKII phosphorylation sites on GluA1 in hippocampal neurons**

Johan-Till Pougnet<sup>1,2</sup>, Benjamin Compans<sup>3,4</sup>, Audrey Martinez<sup>1,2</sup>, Daniel Choquet<sup>3,4,5</sup>,  
Eric Hosity<sup>3,4</sup> and Eric Boué-Grabot<sup>\*1,2</sup>

<sup>1</sup> Univ. de Bordeaux, Institut des Maladies Neurodégénératives, UMR 5293, F-33000 Bordeaux, France;

<sup>2</sup> CNRS, Institut des Maladies Neurodégénératives, UMR 5293, F-33000 Bordeaux, France;

<sup>3</sup> Univ. de Bordeaux, Institut Interdisciplinaire des Neurosciences, UMR 5297, F-33000 Bordeaux, France;

<sup>4</sup> CNRS, Institut Interdisciplinaire des Neurosciences, UMR 5297, F-33000 Bordeaux, France.

<sup>5</sup> Bordeaux Imaging Center, UMS 3420-US4 CNRS, INSERM, Université de Bordeaux

\* : Address correspondence to:

Eric Boué-Grabot, Ph.D.  
Institut des Maladies Neurodégénératives (IMN)  
CNRS UMR 5293,  
Université de Bordeaux,  
146 rue Léo Saignat,  
33076 Bordeaux cedex,  
France.  
Tel: +33 5 57575763;  
Fax: +33 5 57575760;  
E-mail: eric.boue-grabot@u-bordeaux.fr

## Supplementary Figure 1

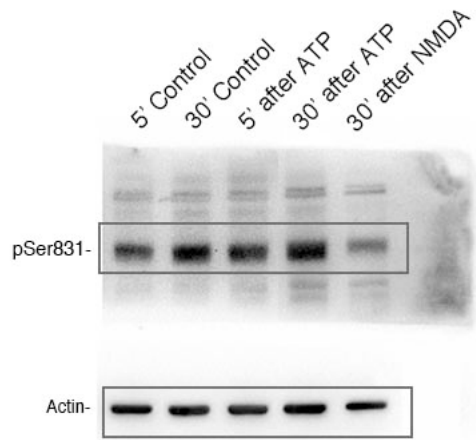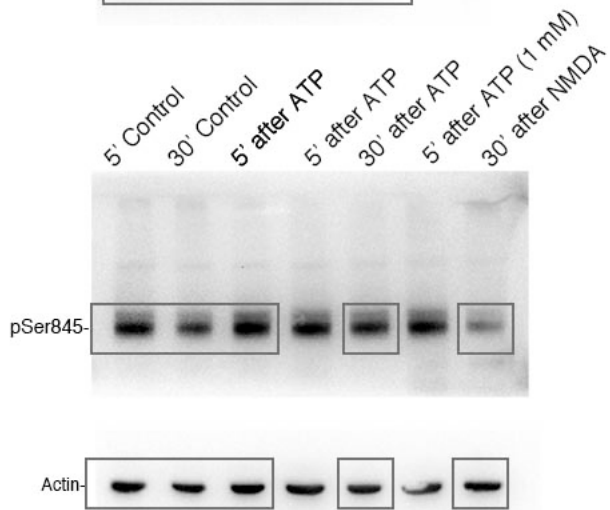

**Fig. 6B**

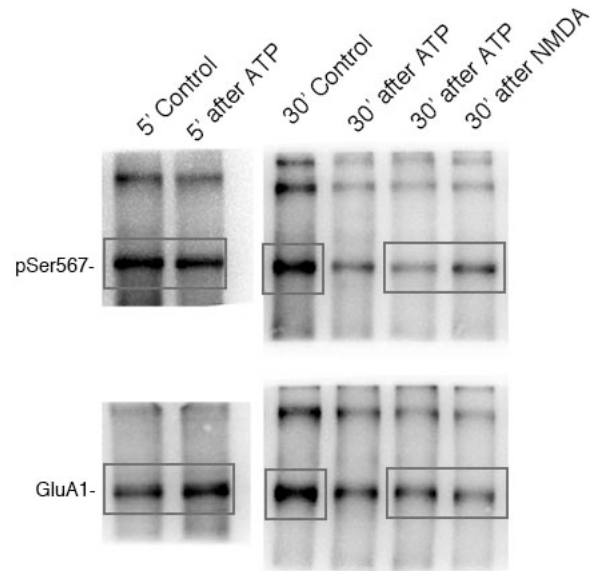

**Fig. 6C**

**Supplementary figure 1.** Full length version of western blots showed in Fig.6B and C.

Lane of blots used to create Fig 6B and 6C panels are framed.

## Supplementary Figure 2

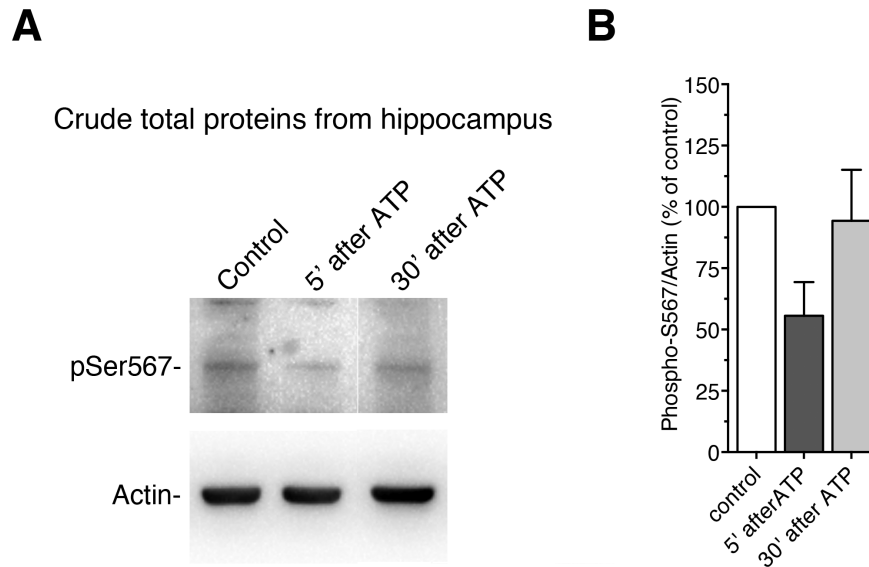

**Supplementary Figure 2. (A) Western blot using anti-phospho-S567 and actin from** crude membrane fractions from control hippocampal slices and ATP-induced synaptic depression slices taken at indicated times 5' or 30' after the application of ATP (300  $\mu$ M for 10 min). In these conditions, the detection of Phospho-S567 revealed no (5 experiments) or at most a faint band (n=2 independent experiments) arising from total proteins difficult to accurately quantify. We thus conducted immunoprecipitation using anti-GluA1 antibodies prior p-S567 detection (see Fig. 6C). **(B)** Quantification of the relative amounts of phosphorylation of GluA1-S567 detected from crude membranes (n=2) showed a transient dephosphorylation of the S567 site of the AMPAR after P2X activation from hippocampal slices, in agreement with results obtained after immunoprecipitation (Fig. 6C).
